# Supplementary material for: Toll-like receptor 4 is a master regulator for colorectal cancer growth under high-fat diet by programming cancer metabolism
Source: PubMed Central journal article supplement (PMC8360949; doi:10.1038/s41419-021-04076-x), 2021-08-12
Supplement: 41419_2021_4076_MOESM2_ESM.pdf [file 41419_2021_4076_MOESM2_ESM.pdf]

# Supplementary Table 1

| id              | HHD_fpkm | HCD_fpkm | HHD_count | HCD_count | Symbol |
|-----------------|----------|----------|-----------|-----------|--------|
| ENSG00000174125 | 0        | 0        | 0         | 0         | TLR1   |
| ENSG00000137462 | 0.11     | 0.06     | 7         | 3         | TLR2   |
| ENSG00000164342 | 0.38     | 0        | 20        | 0         | TLR3   |
| ENSG00000136869 | 0.23     | 0.07     | 16        | 4         | TLR4   |
| ENSG00000187554 | 0        | 0        | 0         | 0         | TLR5   |
| ENSG00000174130 | 0        | 0.03     | 0         | 2         | TLR6   |
| ENSG00000196664 | 0        | 0.05     | 0         | 3         | TLR7   |
| ENSG00000101916 | 0        | 0        | 0         | 0         | TLR8   |
| ENSG00000239732 | 0        | 0        | 0         | 0         | TLR9   |
| ENSG00000174123 | 0        | 0.02     | 0         | 1         | TLR10  |

**Supplementary Table 1.** RNA sequencing analysis of the HHD and HCD tumor tissues. Quantification of the TLR genes in the xenograft tissues. HHD, HFD feeding persisted for 35 days; HCD, HFD feeding for 15 days followed by CD feeding for 20 days. FPKM, fragments per kilobase million; count, total count. n = 4-8 mice in each group.

## Supplementary Table 2

| Fatty acid                                     | HHD:HCD | p-value    | Mass    | Retention Time |
|------------------------------------------------|---------|------------|---------|----------------|
| Myristic acid                                  | up      | 5.72E-07   | 228.206 | 15.210         |
| Oleic acid                                     | up      | 2.82E-08   | 282.256 | 17.744         |
| Palmitic acid                                  | up      | 7.35E-06   | 256.240 | 17.541         |
| Pelargonic acid                                | up      | 6.25E-06   | 316.259 | 10.450         |
| Pentadecylic acid                              | up      | 1.95E-04   | 302.242 | 17.619         |
| Stearic acid                                   | up      | 6.61E-07   | 284.271 | 19.615         |
| 10-Hydroxy-3,7-dimethyl-2E,6E-decadienoic acid | down    | 8.92E-06   | 212.140 | 8.200          |
| 10-tridecynoic acid                            | up      | 2.05E-07   | 210.161 | 7.020          |
| 12-tridecenoic acid                            | up      | 5.24E-04   | 484.374 | 17.129         |
| 12Z,15Z-heneicosadienoic acid                  | down    | 3.63E-04   | 704.585 | 23.409         |
| 12Z-heneicosenoic acid                         | down    | 7.62E-04   | 324.299 | 19.888         |
| 13Z-eicosenoic acid                            | down    | 2.79E-05   | 310.282 | 19.797         |
| 2E,6E,8E,10E-dodecatetraenoic acid             | up      | 1.29E-16   | 192.115 | 7.7859         |
| 2E,6Z,8Z,12E-hexadecatetraenoic acid           | up      | 6.25E-06   | 744.524 | 20.779         |
| 2Z,4E-nonadienoic acid                         | up      | 5.89E-09   | 368.216 | 7.629          |
| 3-undecynoic acid                              | up      | 4.27E-04   | 242.152 | 5.599          |
| 4,8,11,14-Eicosatetraynoic acid                | up      | 1.42E-06   | 592.367 | 18.187         |
| 5,8-heptadecadiynoic acid                      | up      | 1.19E-08   | 322.212 | 11.762         |
| 5-oxo-7-decynoic acid                          | up      | 1.54E-04   | 546.279 | 10.250         |
| 6,9,12,15,18,21-Tetracosahexaynoic acid        | up      | 1.92E-04   | 404.193 | 7.624          |
| 6E,8E,12E,14E-Hexadecatetraen-10-ynoic acid    | up      | 5.79E-11   | 488.296 | 18.641         |
| 8,11,14-nonadecatriynoic acid                  | up      | 1.69E-04   | 346.213 | 14.263         |
| 8Z-Decene-4,6-diynoic acid                     | up      | 6.54E-04   | 546.229 | 19.306         |
| alpha-nonylenic acid                           | up      | 0.00147588 | 216.134 | 7.8041         |
| beta-ethyl acrylic acid                        | up      | 2.21E-08   | 300.155 | 8.4722         |
| cis,cis-dodeca-3,6-dienoic acid                | up      | 1.78E-04   | 196.145 | 8.383          |
| trans,trans-hepta-2,4,6-trienoic acid          | up      | 1.71E-07   | 308.120 | 8.368          |
| trans-beta-octenoic acid                       | down    | 2.01E-08   | 426.305 | 19.279         |

**Supplementary Table 2.** Global lipidomics highlights the fatty acid species that are most significantly affected by the dietary interventions. HHD, HFD feeding persisted for 35 days; HCD, HFD feeding for 15 days followed by CD feeding for 20 days. n = 4-8 mice in each group.

## Supplementary Table 3

| ng/mg protein               | Palmitic acid                | Stearic acid                 | Oleic acid                   |
|-----------------------------|------------------------------|------------------------------|------------------------------|
| <b>CD</b>                   | 1.0204±0.0281                | 0.5120±0.0186                | 4.0387±0.0200                |
| <b>HD</b>                   | 3.7802±0.6189 <sup>a</sup>   | 1.5079±0.2044 <sup>a,e</sup> | 2.5580±0.4097 <sup>a,d</sup> |
| <b>HHD</b>                  | 4.6550±0.2315 <sup>a</sup>   | 14.0742±0.3258 <sup>c</sup>  | 0.1180±0.0005 <sup>b</sup>   |
| <b>HCD</b>                  | 3.0331±0.1777 <sup>a,d</sup> | 1.2206±0.0292 <sup>a,e</sup> | 0.0967±0.0046 <sup>b</sup>   |
| <b>Retention time (min)</b> | 17.541                       | 19.615                       | 17.744                       |
| <b>Accurate MS</b>          | 256.2402                     | 284.2715                     | 282.2559                     |

**Supplementary Table 3.** Quantification of the palmitic acid, stearic acid and oleic acid in the tumor tissues of the mouse models under different dietary interventions. Data are shown as means ± SEM. n = 4-8 mice in each group. a< 0.05, b< 0.01, c<0.001 compared to CD; d< 0.05, e<0.001 compared to HHD. CD, match control diet feeding; HD, high fat diet feeding; HHD, HFD feeding persisted for 35 days; HCD, HFD feeding for 15 days followed by CD feeding for 20 days.

A

| Name                                                  | Citable Accession | Gene Name | KO-HFD/<br>HFD | KO-HFD/<br>HFD | KO-HFD/<br>KO-CD | KO-HFD/<br>KO-CD | Mass(KDa) | GRAVY        | Isoelectric Point |
|-------------------------------------------------------|-------------------|-----------|----------------|----------------|------------------|------------------|-----------|--------------|-------------------|
| Isocitrate dehydrogenase                              | O75874            | IDH1      | 0.501187205    | down           | 0.855066717      | --               | 46.659    | -0.39178744  | 6.53              |
| Apoptosis-inducing factor 1                           | O95831            | AIFM1     | 0.444631308    | down           | 0.758577585      | --               | 66.9001   | -0.268189233 | 9.04              |
| ATP-dependent RNA helicase                            | Q92499            | DDX1      | 0.580764413    | down           | 0.772680581      | --               | 82.4317   | -0.395540541 | 6.8               |
| Glyoxalase domain-containing protein 4                | Q9HC38            | GLOD4     | 0.636795521    | down           | 1.047129035      | --               | 34.7932   | -0.383067093 | 5.4               |
| Mitochondrial import receptor subunit TOM34           | Q15785            | TOMM34    | 0.380189389    | down           | 0.731139123      | --               | 34.559    | -0.609385113 | 9.12              |
| Transforming growth factor-beta-induced protein ig-h3 | Q15582            | TGFBI     | 0.597035289    | down           | 1.037528038      | --               | 74.6802   | -0.085065886 | 7.62              |
| Phosphoenolpyruvate carboxykinase                     | Q16822            | PCK2      | 0.416869402    | down           | 0.920449615      | --               | 70.6984   | -0.27546875  | 7.57              |
| Adipocyte plasma membrane-associated protein          | Q9HDC9            | APMAP     | 0.654636085    | down           | 0.972747207      | --               | 46.4799   | -0.186298077 | 5.82              |
| Aldehyde dehydrogenase                                | P05091            | ALDH2     | 0.349945188    | down           | 0.981747925      | --               | 56.3809   | -0.13655706  | 6.63              |
| Rho GTPase-activating protein 1                       | Q07960            | ARHGAP1   | 0.492039502    | down           | 0.937561989      | --               | 50.4353   | -0.366514806 | 5.85              |
| NAD(P) transhydrogenase                               | Q13423            | NNT       | 0.212813899    | down           | 0.809095919      | --               | 113.8946  | 0.29907919   | 8.31              |
| Phosphoserine aminotransferase                        | Q9Y617            | PSAT1     | 0.461317599    | down           | 1.047129035      | --               | 40.4224   | 0.019459459  | 7.56              |
| Acetyl-CoA acetyltransferase                          | Q9BWD1            | ACAT2     | 0.642687678    | down           | 1.116863012      | --               | 41.3505   | 0.202518892  | 6.46              |
| Glutamine synthetase                                  | P15104            | GLUL      | 0.224905506    | down           | 0.619441092      | down             | 42.0641   | -0.595710456 | 6.43              |
| Flotillin-1                                           | O75955            | FLOT1     | 0.580764413    | down           | 1.076465011      | --               | 47.355    | -0.338407494 | 7.08              |
| Tyrosine-protein kinase CSK                           | P41240            | CSK       | 0.630957425    | down           | 0.855066717      | --               | 50.704    | -0.268444444 | 6.62              |
| Glutathione peroxidase 1                              | P07203            | GPX1      | 0.591561615    | down           | 0.679203629      | --               | 22.0879   | -0.069950739 | 6.15              |
| Carnitine O-acetyltransferase                         | P43155            | CRAT      | 0.081658237    | down           | 0.586138189      | down             | 70.8571   | -0.241533546 | 8.63              |
| Programmed cell death protein 4                       | Q53EL6            | PDCD4     | 0.619441092    | down           | 0.990831971      | --               | 51.7348   | -0.484008529 | 5.07              |
| Isocitrate dehydrogenase subunit alpha                | P50213            | IDH3A     | 0.510505021    | down           | 1.355188966      | --               | 39.5914   | -0.056284153 | 6.46              |
| Acetyl-coenzyme A synthetase                          | Q9NR19            | ACSS2     | 0.322106898    | down           | 0.920449615      | --               | 78.5791   | -0.27703281  | 6.02              |
| MAP kinase-activated protein kinase 2                 | P49137            | MAPKAPK2  | 0.597035289    | down           | 0.672976673      | --               | 45.5674   | -0.476       | 8.87              |
| Mitochondrial Rho GTPase 2                            | Q8IXI1            | RHOT2     | 0.534564376    | down           | 1.066596031      | --               | 68.1172   | -0.102588997 | 5.55              |
| ATP-binding cassette sub-family D member 1            | P33897            | ABCD1     | 0.524807513    | down           | 0.809095919      | --               | 82.9361   | -0.055167785 | 9.09              |
| Beta-hexosaminidase subunit alpha                     | P06865            | HEXA      | 0.319153786    | down           | 0.963828981      | --               | 60.7023   | -0.222306238 | 5.04              |
| Insulin-like growth factor 2 mRNA-binding protein 1   | Q9NZI8            | IGF2BP1   | 0.044463132    | down           | 0.220800504      | down             | 63.4802   | -0.470710572 | 9.26              |
| Acyl-CoA-binding protein                              | P07108            | DBI       | 0.608134985    | down           | 1.367728949      | --               | 10.0444   | -0.897701149 | 6.12              |
| Long-chain-fatty-acid--CoA ligase 4                   | O60488            | ACSL4     | 0.229086801    | down           | 1.028015971      | --               | 79.1874   | -0.19395218  | 8.66              |
| Isobutyryl-CoA dehydrogenase                          | Q9UKU7            | ACAD8     | 0.474242002    | down           | 0.862978518      | --               | 45.0694   | -0.050843373 | 8.12              |
| 4-aminobutyrate aminotransferase                      | P80404            | ABAT      | 0.169044107    | down           | 0.73790431       | --               | 56.4384   | -0.2652      | 8.17              |
| GTP-binding protein Rheb                              | Q15382            | RHEB      | 0.478630096    | down           | 0.981747925      | --               | 20.4973   | -0.094021739 | 5.65              |
| Acetoacetyl-CoA synthetase                            | Q86V21            | AACS      | 0.322106898    | down           | 0.779830098      | --               | 75.1436   | -0.150297619 | 5.86              |
| Glutathione peroxidase 2                              | P18283            | GPX2      | 0.383707315    | down           | 0.765596628      | --               | 21.9538   | -0.32        | 7.64              |
| Galactose-1-phosphate uridylyltransferase             | P07902            | GALT      | 0.636795521    | down           | 0.928966403      | --               | 43.3628   | -0.565963061 | 6.49              |
| Pyruvate dehydrogenase kinase isozyme 3               | Q15120            | PDK3      | 0.244343102    | down           | 1.08642602       | --               | 46.9385   | -0.390394089 | 8.46              |
| Pyruvate kinase                                       | P14618            | PKM       | 3.630779982    | up             | 1.066596031      | --               | 57.9364   | -0.128060264 | 7.96              |
| ATP-citrate synthase                                  | P53396            | ACLY      | 3.732501984    | up             | 1.08642602       | --               | 120.8383  | -0.105267938 | 6.95              |
| ATP synthase subunit beta                             | P06576            | ATP5B     | 2.147830009    | up             | 1.30617094       | --               | 56.5594   | 0.018147448  | 5.26              |
| 2,4-dienoyl-CoA reductase                             | Q16698            | DECR1     | 2.937649965    | up             | 1.158776999      | --               | 36.0674   | -0.019701493 | 9.35              |
| Acyl-CoA dehydrogenase family member 9                | Q9H845            | ACAD9     | 1.819700956    | up             | 1.08642602       | --               | 68.7597   | -0.095491143 | 8.15              |
| ATP synthase subunit d, mitochondrial                 | O75947            | ATP5H     | 1.995262027    | up             | 1.16949904       | --               | 18.491    | -0.554037267 | 5.21              |
| Fatty acid-binding protein 5                          | Q01469            | FABP5     | 8.165823936    | up             | 1.047129035      | --               | 15.1644   | -0.457777778 | 6.59              |
| Aspartate aminotransferase                            | P17174            | GOT1      | 1.584892988    | up             | 1.047129035      | --               | 46.2471   | -0.276513317 | 6.53              |
| ATP synthase subunit alpha                            | P25705            | ATP5F1    | 2.312064886    | up             | 1.158776999      | --               | 59.7501   | -0.066726944 | 9.16              |
| Insulin-like growth factor 2 mRNA-binding protein 2   | Q9Y6M1            | IGF2BP2   | 4.446312904    | up             | 0.801678121      | --               | 66.121    | -0.403505843 | 8.48              |
| Glycogen phosphorylase                                | P06737            | PYGL      | 1.836537957    | up             | 1.224616051      | --               | 97.1478   | -0.32325856  | 6.71              |

B

| Name           | Citable Accession | Gene Name | KO-HFD/<br>HFD | KO-HFD/<br>HFD | KO-HFD/<br>KO-CD | KO-HFD/<br>KO-CD | Mass(KDa) | GRAVY       | Isoelectric Point |
|----------------|-------------------|-----------|----------------|----------------|------------------|------------------|-----------|-------------|-------------------|
| Catenin beta-1 | P35222            | CTNNB1    | 0.270395786    | down           | 0.972747207      | --               | 85.4959   | -0.17503201 | 5.53              |

**Supplementary Table 4.** iTRAQ proteomics analysis reveal the (A) metabolic enzymes that were significantly upregulated or downregulated and (B)  $\beta$ -catenin level in the tumor tissues. KO-CD, mice inoculated with TLR4-KO HCT116 cells had CD diet; KO-HFD, mice inoculated with TLR4-KO HCT116 cells had HFD diet; HFD, mice inoculated with HCT116 cells had HFD diet.
