# Supplementary material for: Toll-like receptor 4 is a master regulator for colorectal cancer growth under high-fat diet by programming cancer metabolism
Source: PubMed Central journal article supplement (PMC8360949; doi:10.1038/s41419-021-04076-x), 2021-08-12
Supplement: 41419_2021_4076_MOESM4_ESM.pdf [file 41419_2021_4076_MOESM4_ESM.pdf]

# DECLARATION OF CONTRIBUTIONS TO ARTICLE

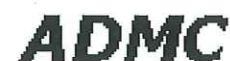

Manuscript Number:

CDDIS-21-1300

Journal Name:

*Cell Death & Disease*

(the 'Journal')

Proposed Title of the Contribution:

Toll-like receptor 4 is a master regulator for colorectal cancer growth under high-fat diet by programming the cancer metabolism

(the 'Contribution')

Author(s):

Xianjing Hu, Sarwat Fatima, Minting Chen, Keyang Xu, Chunhua Huang, Rui-Hong Gong, Tao Su, Hoi Leong Xavier Wong, Zhaoxiang Bian, Hiu Yee Kwan

(the 'Authors')

For all *CDDis* articles, each person named as an author in the published version must be able to show he or she has contributed substantially to the article.

Authorship credit should be based on 1) substantial contributions to conception and design, acquisition of data, or analysis and interpretation of data; 2) drafting the article or revising it critically for important intellectual content; and 3) final approval of the version to be published. Authors should meet conditions 1, 2 and 3.

Any person who cannot be shown to have made a substantial contribution to the article cannot be listed as an author in the final version. The name of any person who is deemed to have made a minor contribution can, however, appear in the Acknowledgments section of the article.

Please complete the table below to indicate the contributions of all named authors to the manuscript.

Author Full Name:

Specification of Contribution to the Manuscript:

|                       |                                                                                                        |
|-----------------------|--------------------------------------------------------------------------------------------------------|
| Xianjing Hu           | Data curation and formal analysis, writing, funding acquisition                                        |
| Sarwat Fatima         | Data curation and formal analysis, writing                                                             |
| Minting Chen          | Data curation and formal analysis, writing                                                             |
| Keyang Xu             | Data curation and formal analysis                                                                      |
| Chunhua Huang         | Data curation and formal analysis                                                                      |
| Rui-Hong Gong         | Data curation and formal analysis                                                                      |
| Tao Su                | Review and editing                                                                                     |
| Hoi Leong Xavier Wong | Review and editing                                                                                     |
| Zhaoxiang Bian        | Conceptualization, review and editing, funding acquisition                                             |
| Hiu Yee Kwan          | Conceptualization, Data curation and formal analysis, writing, review and editing, funding acquisition |
|                       |                                                                                                        |
|                       |                                                                                                        |
|                       |                                                                                                        |

Please complete the table below to indicate the contributions of all named authors to the figures.

Figure 1:

Sarwat Fatima, Xianjing Hu, Hiu Yee Kwan

Figure 2:

Sarwat Fatima, Xianjing Hu, Hiu Yee Kwan

Figure 3:

Xianjing Hu, Sarwat Fatima, Minting Chen

Figure 4:

Xianjing Hu, Sarwat Fatima, Minting Chen

Figure 5:

Xianjing Hu, Chunhua Huang, Rui-Hong Gong

Figure 6:

Xianjing Hu, Keyang Xu

Signed for and on behalf of the Author(s):



Print Name:

Kwan Hiu Yee

Date:

13th July 2021
